# Supplementary material for: Structural basis for ligand binding modes of CTP synthase
Source: PubMed Central journal article supplement (PMC8325340; doi:10.1073/pnas.2026621118), 2021-07-23
Supplement: pnas.2026621118.sapp.pdf [file pnas.2026621118.sapp.pdf]

# **Structural basis for ligand binding modes of CTP synthase**

Xian Zhou<sup>1,†</sup>, Chen-Jun Guo<sup>1,2,3,†</sup>, Chia-Chun Chang<sup>1,†</sup>, Jiale Zhong<sup>1,2,3</sup>, Huan-Huan Hu<sup>1,2,3</sup>, Guang-Ming Lu<sup>1,2,3</sup>, and Ji-Long Liu<sup>1\*</sup>

**SUPPLEMENTAL INFORMATION**

**SUPPLEMENTAL TABLE S1 AND FIGURES S1-S12**

**SUPPLEMENTAL MOVIE S1**

**Table S1. Cryo-EM data collection and model refinement**

|                                          | dmCTPS+Sub<br>(EMD-30810, PDB 7DPT) | dmCTPS+Pro<br>(EMD-30811, PDB 7DPW) |
|------------------------------------------|-------------------------------------|-------------------------------------|
| <b>Data collection</b>                   |                                     |                                     |
| EM equipment                             | Titan Krios                         | Titan Krios                         |
| Detector                                 | K3 camera                           | K3 camera                           |
| Magnification                            | 22,500x                             | 22,500x                             |
| Voltage (kV)                             | 300                                 | 300                                 |
| Electron exposure ((e-/Å <sup>2</sup> )) | 60                                  | 60                                  |
| Defocus range(μm)                        | -1.0 to -2.3                        | -1.0 to -2.3                        |
| Pixel size(Å)                            | 0.53                                | 0.53                                |
| Symmetry imposed                         | D2                                  | D2                                  |
| Number of collected movies               | 2878                                | 2259                                |
| Initial particle images (no.)            | 424195                              | 1563553                             |
| Final particle images (no.)              | 107556                              | 344869                              |
| Map resolution (Å)                       | 2.5                                 | 2.7                                 |
| FSC threshold                            | 0.143                               | 0.143                               |
| Map resolution range (Å)                 | 2.4 - 3.8                           | 2.5 - 4.7                           |
| <b>Refinement</b>                        |                                     |                                     |
| Initial model used (PDB code)            | 6L6Z                                | 6LFG                                |
| Map sharpening B-factor(Å <sup>2</sup> ) | -77                                 | -90                                 |
| Model composition                        |                                     |                                     |
| Non-hydrogen atoms                       | 18036                               | 17812                               |
| Protein residues                         | 2224                                | 2224                                |
| Ligands                                  | UTP,ATP,GTP,DON                     | CTP                                 |
| Waters                                   | 76                                  | 32                                  |
| Ions                                     | 12                                  | 8                                   |
| B factors(Å <sup>2</sup> )               |                                     |                                     |
| Protein                                  | 97                                  | 68                                  |
| Ligand                                   | 88                                  | 32                                  |
| Water                                    | 87                                  | 38                                  |
| R.m.s. deviations                        |                                     |                                     |
| Bond lengths (Å)                         | 0.006                               | 0.008                               |
| Bond angles (°)                          | 0.663                               | 0.81                                |
| Validation                               |                                     |                                     |
| MolProbity score                         | 1.69                                | 2.56                                |
| Clashscore                               | 3.24                                | 7.84                                |
| Poor rotamers (%)                        | 1.44                                | 8.02                                |
| Ramachandran plot                        |                                     |                                     |
| Favored (%)                              | 92.78                               | 93.14                               |
| Allowed (%)                              | 7.04                                | 6.68                                |
| Disallowed (%)                           | 0.18                                | 0.18                                |

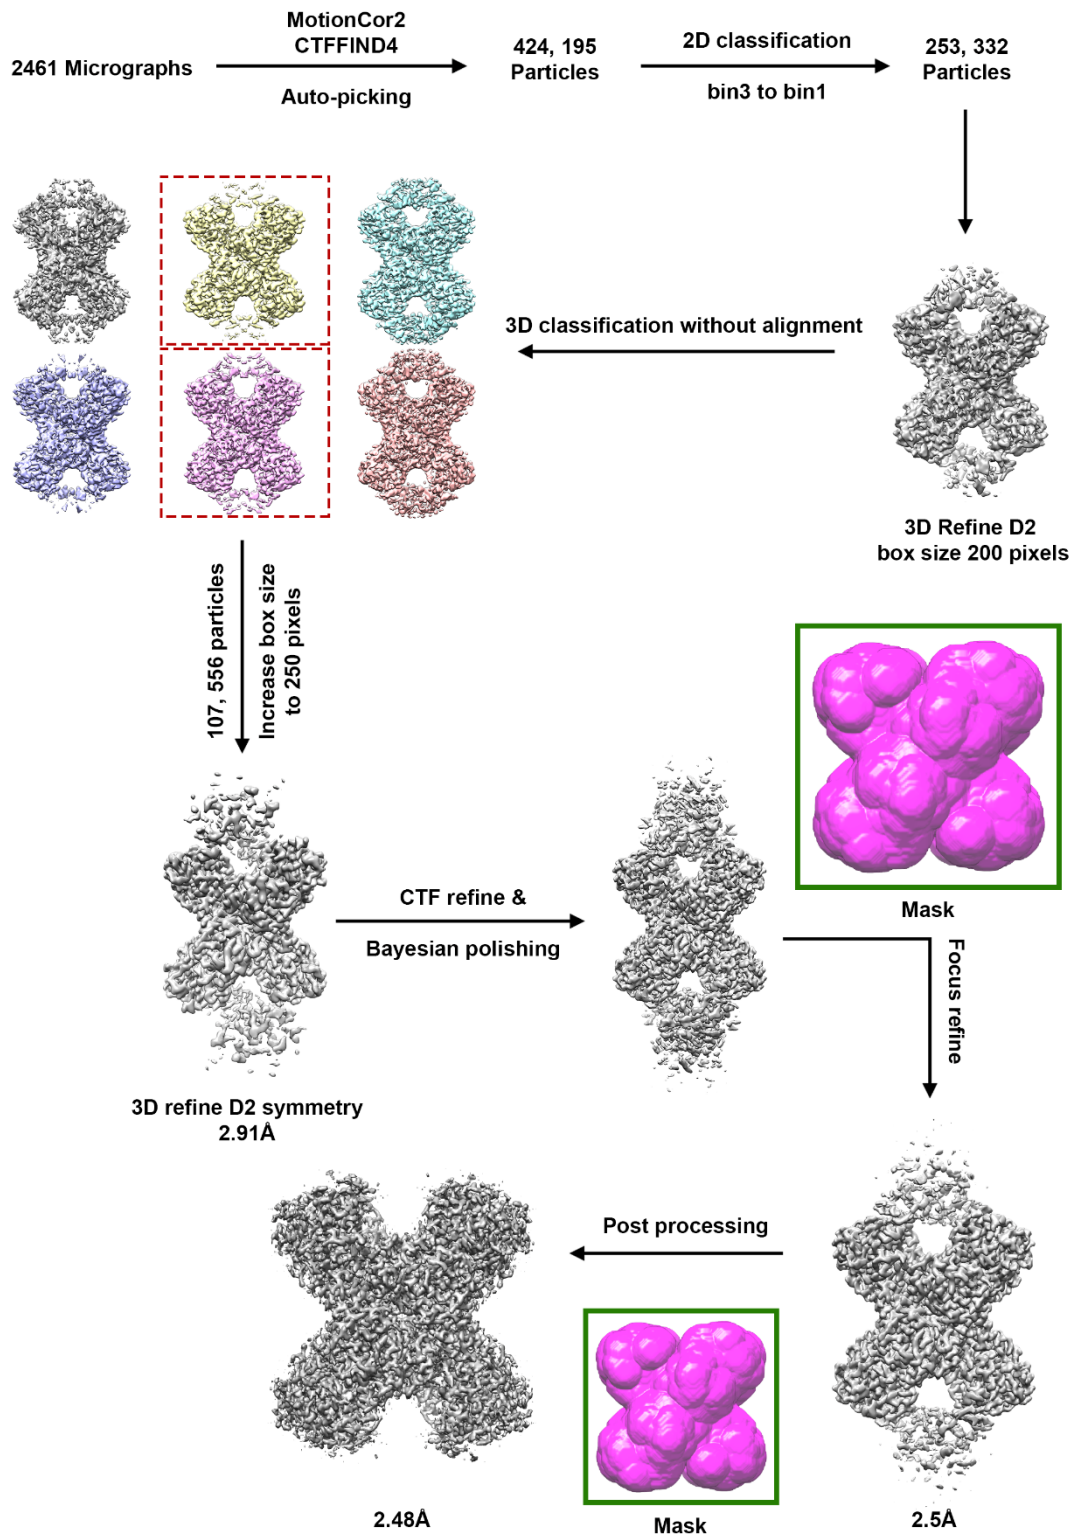

**Figure S1. Image processing work flow of substrate-bound dmCTPS tetramer.** In the reconstruction of the dmCTPS<sup>+Sub</sup> tetramer, we collected 2461 micrographs and 253,332 particles were kept after 2D classification. After re-extraction of particles of dmCTPS<sup>+Sub</sup> tetramer, different reconstructions were performed to generate the final map and model.

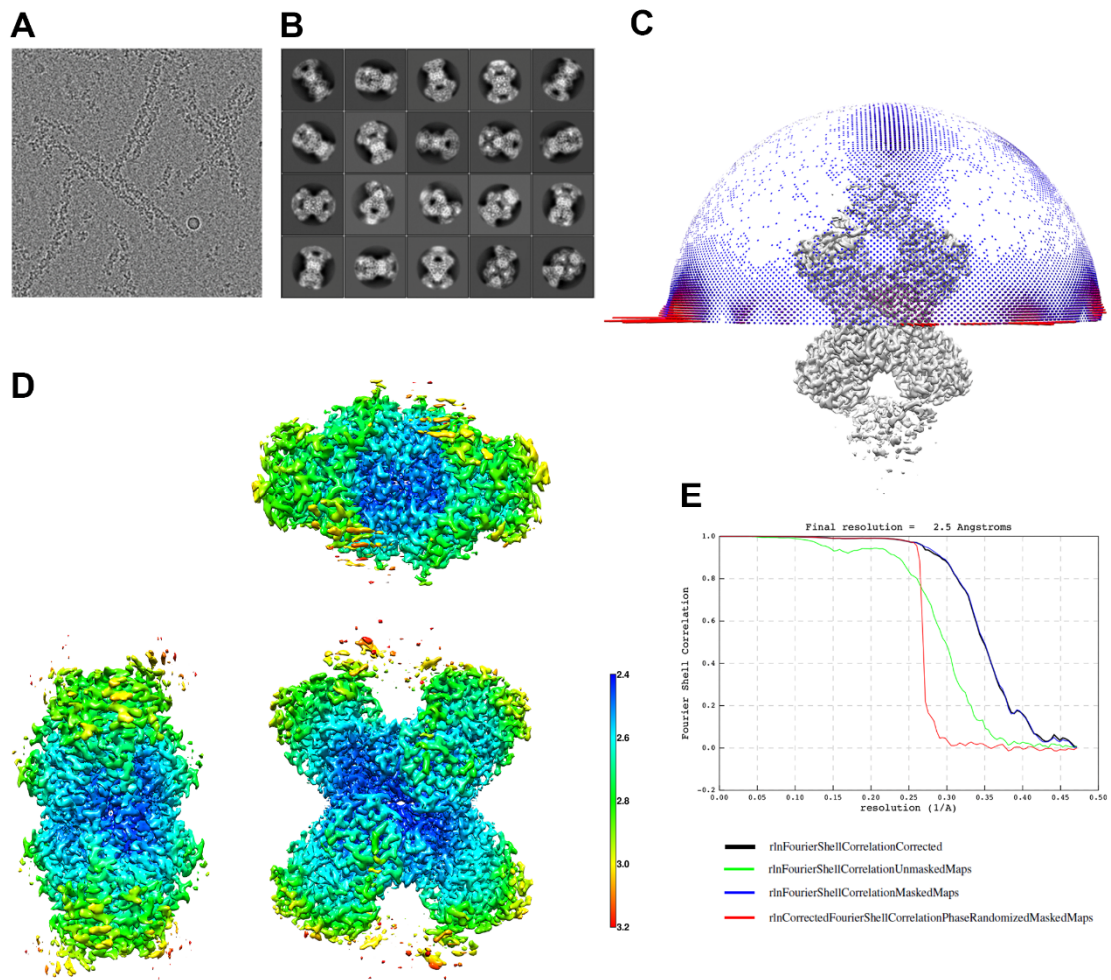

**Figure S2. Statistics of the final density maps of the dmCTPS<sup>+Sub</sup> tetramer.** **a**, A representative cryo-EM micrograph of dmCTPS<sup>+Sub</sup> tetramer/polymer. **b**, Representative 2D class averages of different views of the porcine dmCTPS<sup>+Sub</sup> tetramer. **c**, Particle orientation distributions of the dmCTPS<sup>+Sub</sup> tetramer in the last iteration of the 3D auto-refinement. **d**, Local resolution map of the dmCTPS<sup>+Sub</sup> tetramer final 3D density map. **e**, Gold-standard FSC curve of the final density maps of the dmCTPS<sup>+Sub</sup> tetramer.

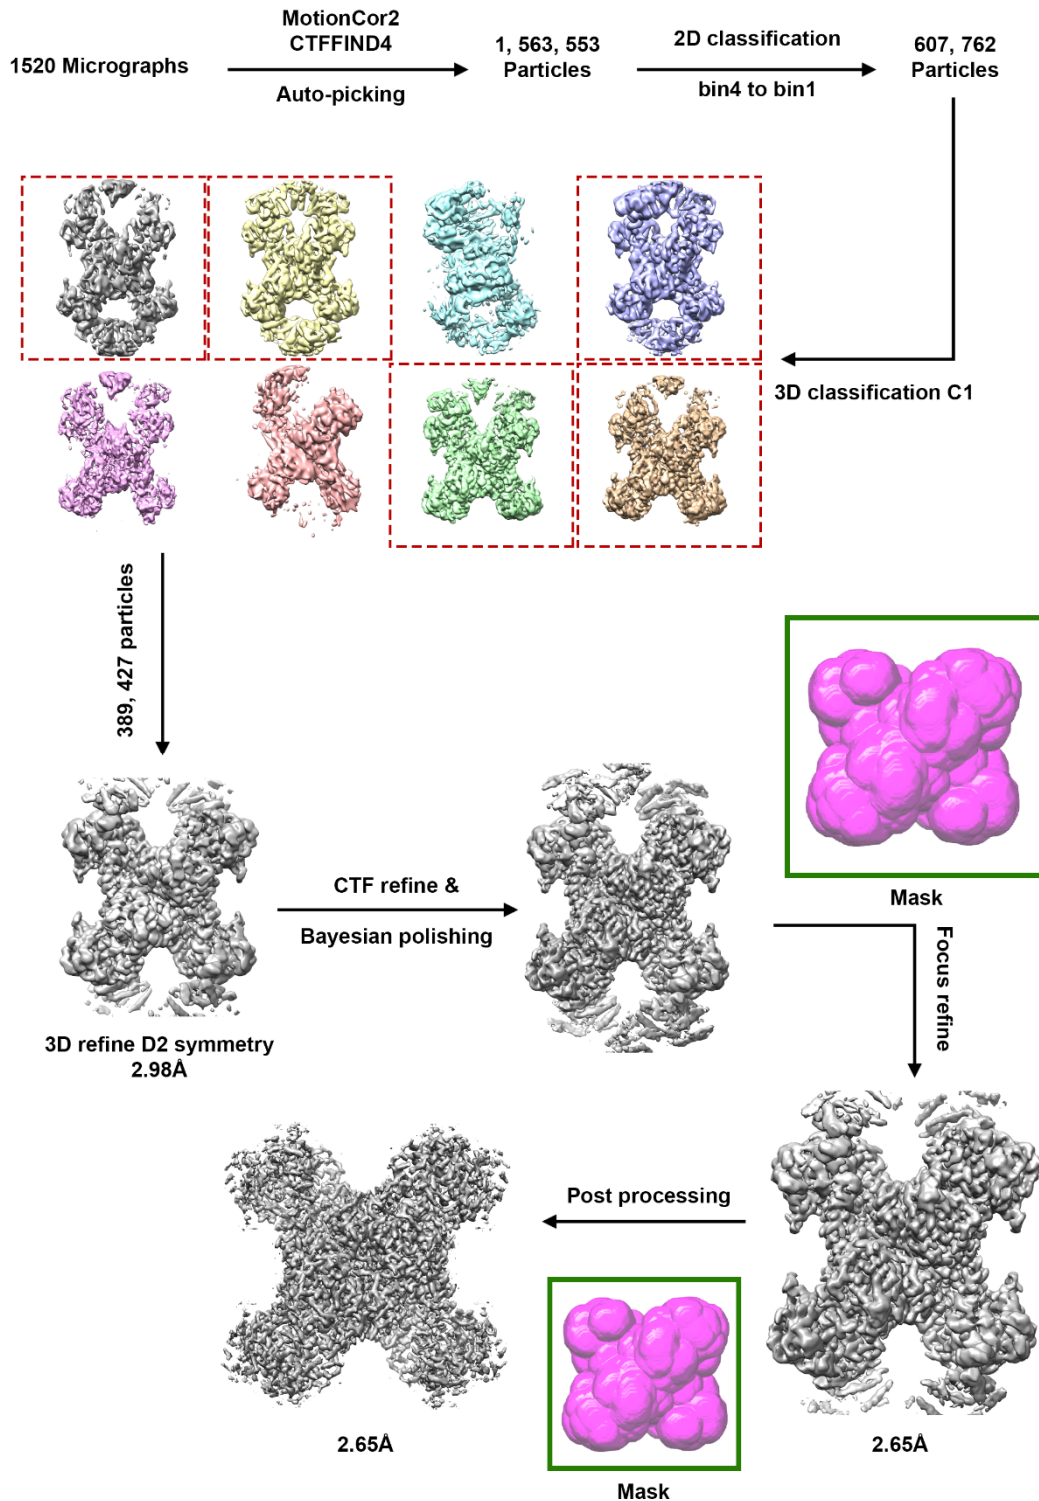

**Figure S3. Image processing work flow of product-bound dmCTPS tetramer.** In the reconstruction of the dmCTPS<sup>+Pro</sup> tetramer, we collected 1520 micrographs and 607,762 particles were kept after 2D classification. After re-extraction of particles of dmCTPS<sup>+Pro</sup> tetramer, different reconstructions were performed to generate the final map and model.

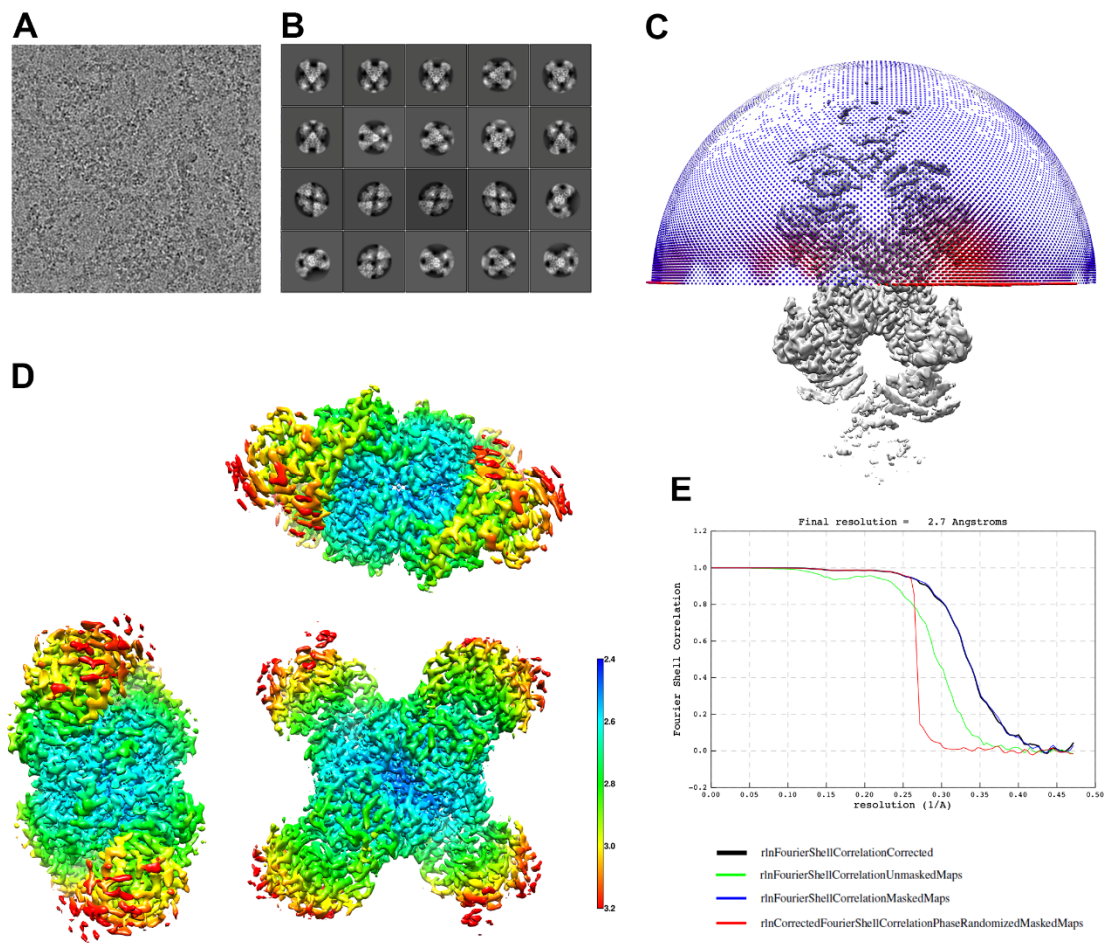

**Figure S4. Statistics of the final density maps of the dmCTPS<sup>+Pro</sup> tetramer.** **a**, A representative cryo-EM micrograph of dmCTPS<sup>+Pro</sup> tetramer/polymer. **b**, Representative 2D class averages of different views of the porcine dmCTPS<sup>+Pro</sup> tetramer. **c**, Particle orientation distributions of the dmCTPS<sup>+Pro</sup> tetramer in the last iteration of the 3D auto-refinement. **d**, Local resolution map of the dmCTPS<sup>+Pro</sup> tetramer final 3D density map. **e**, Gold-standard FSC curve of the final density maps of the dmCTPS<sup>+Pro</sup> tetramer.

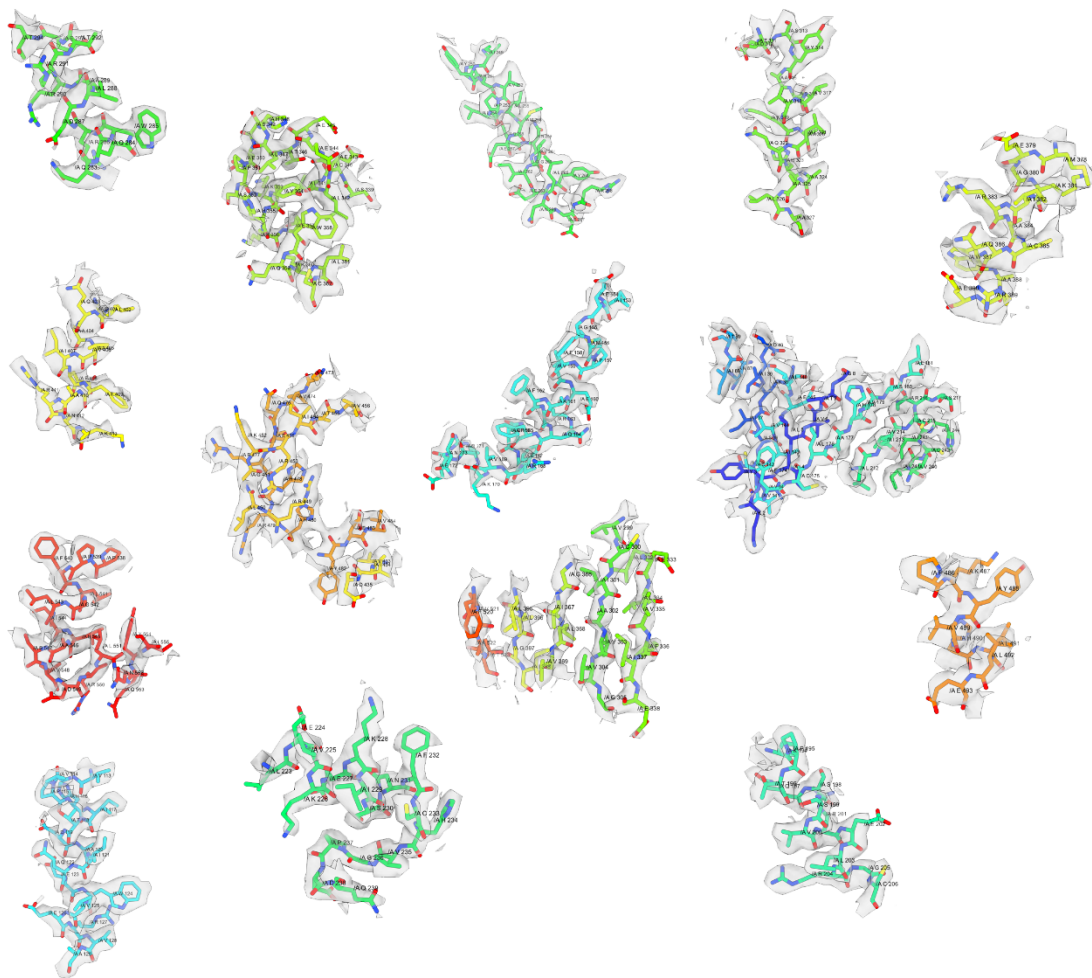

**Figure S5. Representative electron density map of individual regions of dmCTPS<sup>+Sub</sup> model.**

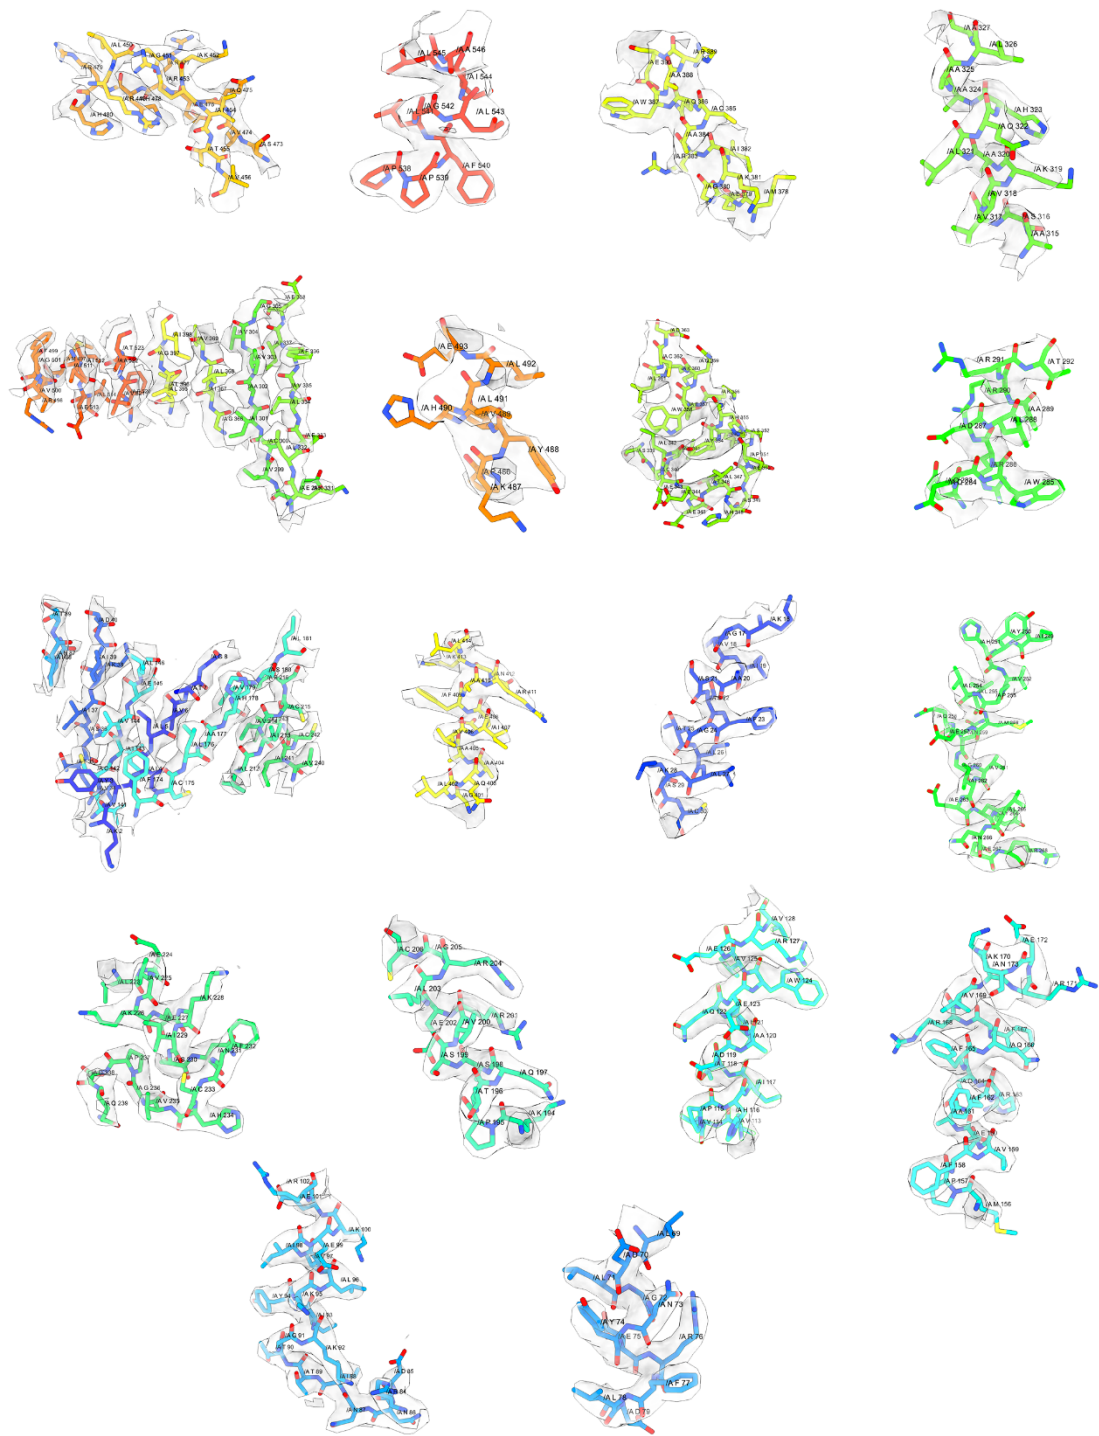

**Figure S6. Representative electron density map of individual regions of dmCTPS<sup>+</sup>Pro model.**



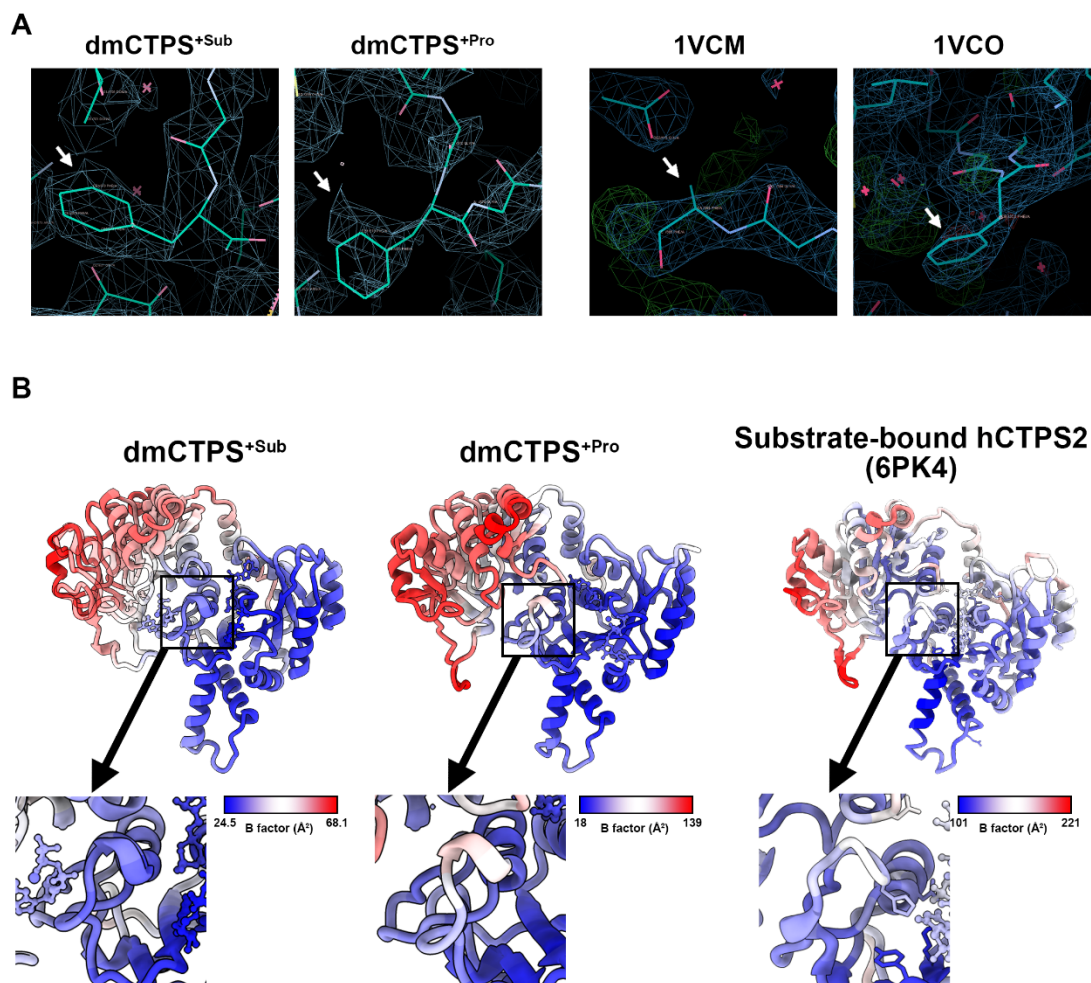

**Figure S7. The comparisons of electron density maps of dmCTPS with reported CTPS models.** **a**, The electron density maps of Phe373 in dmCTPS<sup>+Sub</sup>, dmCTPS<sup>+Pro</sup>, and of Phe365 in *Thermus thermophilus* CTPS in the apo state (1VCM) and the glutamine-bound state (1VCO). Phe373 in dmCTPS and Phe365 in ttCTPS are indicated by arrows. **b**, B factors are shown on monomers of dmCTPS<sup>+Sub</sup>, dmCTPS<sup>+Pro</sup> and substrate-bound hCTPS2 (6PK4) models. The region of the ammonia tunnel is highlighted.

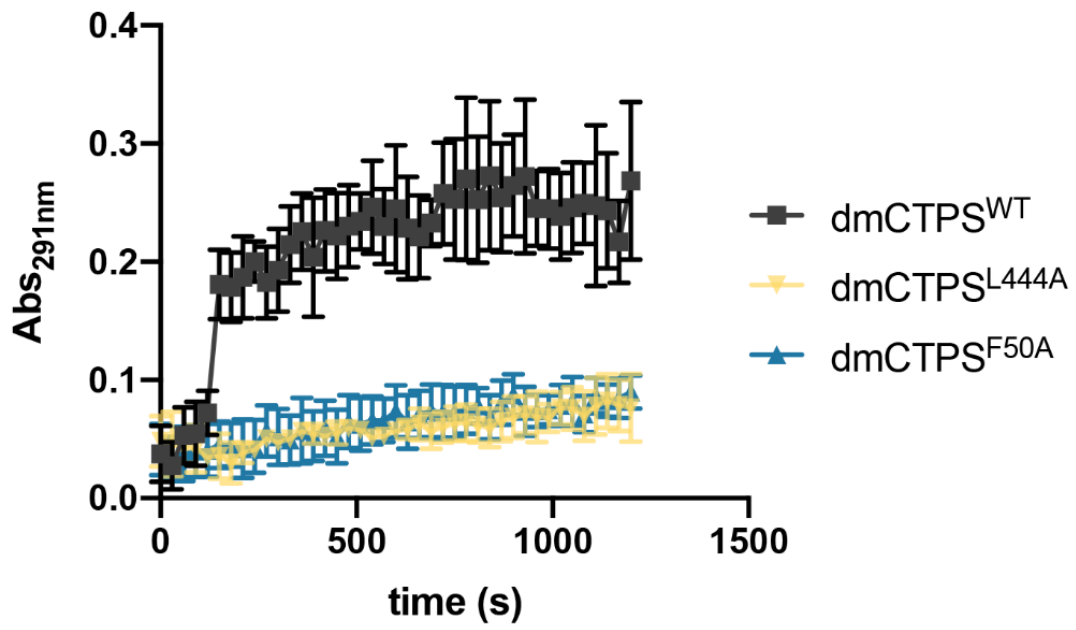

**Figure S8. Analysis for generation of CTP by mutant dmCTPS (F50A and L444A) in condition with 2 mM of GTP.**

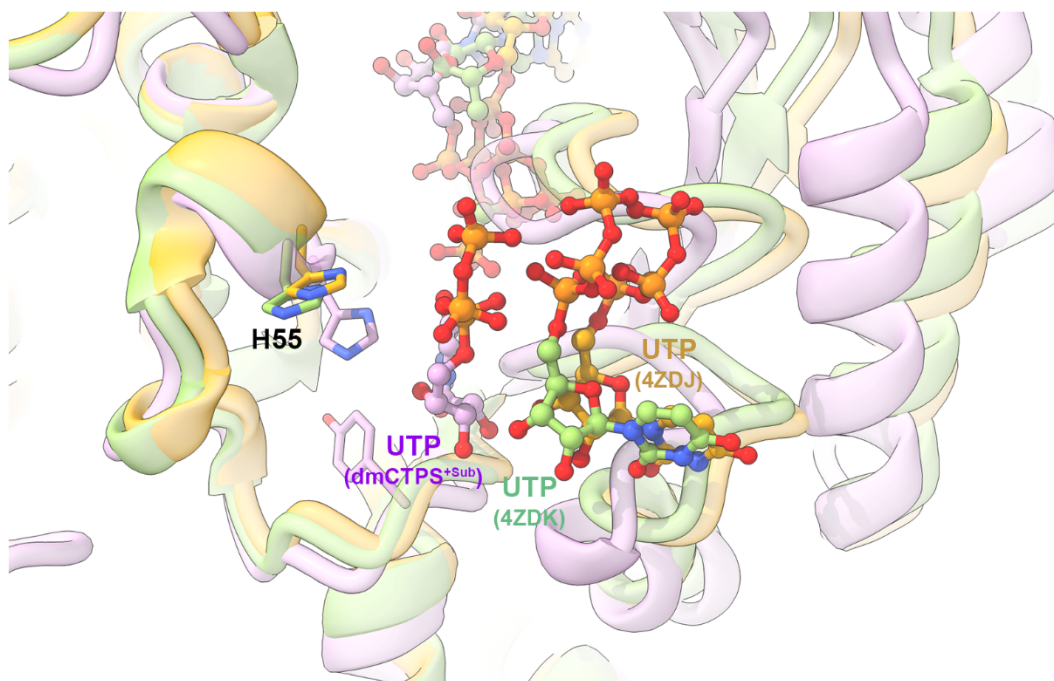

**Figure S9. The structure comparison indicates the difference of distance between His55 and UTP in the open and closed CTPS conformations. The dmCTPS<sup>+Sub</sup> model is shown in pink, the models of *Mycobacterium tuberculosis* CTPS (4ZDK, bound with UTP, ACP and DON) and (4ZDJ, bound with UTP) are shown in green and yellow, respectively.**

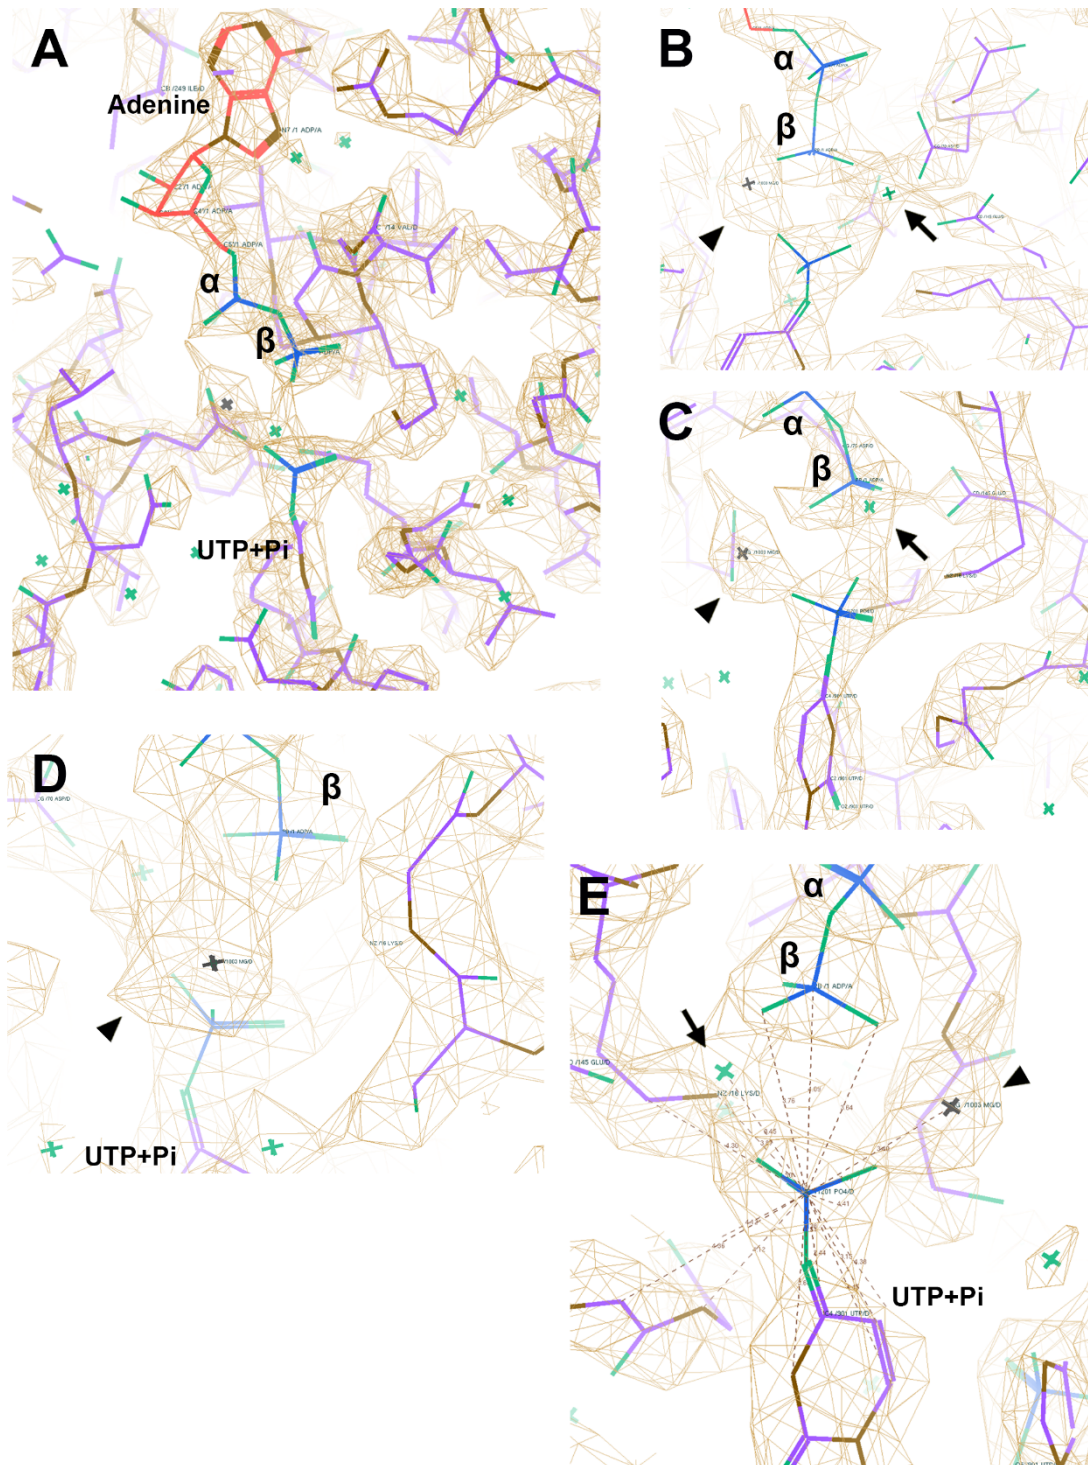

**Figure S10. The electron density map of ligands at the AL domain active site of substrate-bound state.** **a**, The general map of ligands at the AL domain when the map level was set as  $10\sigma$ . In the map the  $\alpha$ -phosphate and  $\beta$ -phosphate of the ATP match the density very well. However, the  $\gamma$ -phosphate of the ATP is not seen with the same setting. Meanwhile, a large density appears to be connected with the uracil of the UTP. **b, c**, There are two other density groups are located at both sides of the  $\beta$ -phosphate of ADP (indicated by arrow and arrowhead). Although the density indicated by the arrow

is connected with the  $\beta$ -phosphate, its size is too small to be a phosphate. In addition, it is also connected with Asp70, Glu145 and the additional density on the uracil, making it unlikely a phosphate. **d**, The density indicated by the arrowhead displays a density extension under lower map level ( $7.2\sigma$ ), implying the presence of six bound water molecules. According to the catalytic process, we suggest the additional density on the uracil is the  $\gamma$ -phosphate of the ATP transferred to the 4-oxygen atom of the uracil base and the arrow and arrowhead indicate a water and a  $Mg^{2+}$  ion, respectively. **e**, The distance from the  $\beta$ -phosphate of ADP to the phosphate on the uracil is about 4.09 Å, far larger than the ordinary distance between  $\beta$ - and  $\gamma$ -phosphate. Meanwhile, the  $Mg^{2+}$  is slightly merged with the phosphate on the uracil. These suggest that transfer of  $\gamma$ -phosphate which is catalyzed by the  $Mg^{2+}$  is captured in our model.

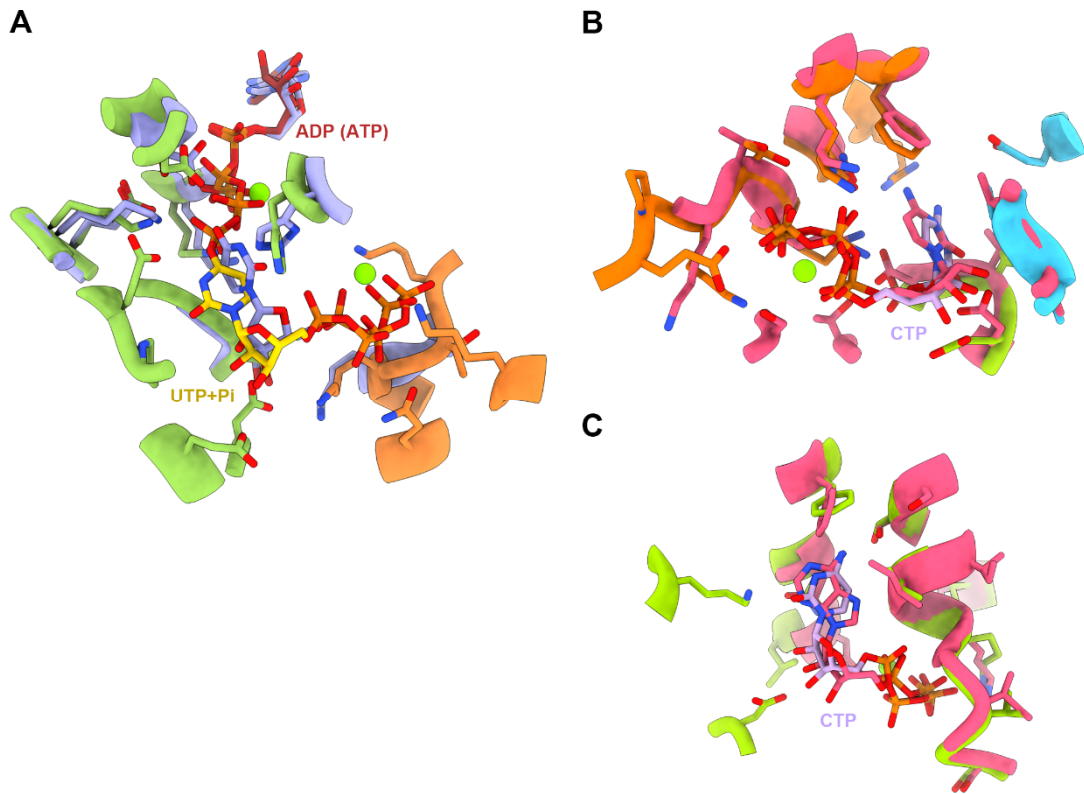

**Figure S11. The comparison of dmCTPS and hCTPS2 at ATP/ADP, UTP and CTP binding sites.** **a**, The structural comparison of dmCTPS<sup>+Sub</sup> and substrate-bound hCTPS2 (6PK4) shows similar binding modes of ATP/ADP and UTP. **b** and **c**, The structural comparison of dmCTPS<sup>+Pro</sup> and product-bound hCTPS2 (6PK7) shows the binding modes of CTP at UTP binding site (**b**) and ADP binding site (**c**).

SP|Q9VUL1|PYRG\_DROME

SP|Q9VUL1|PYRG\_DROME
SP|P17812|PYRG1\_HUMAN
SP|Q9NRF8|PYRG2\_HUMAN
SP|P0A7E5|PYRG\_ECOLI
SP|Q5S1A8|PYRG\_THET8
SP|P9WHK7|PYRG\_MYCTU
TR|A0A2A9ISY4|A0A2A9ISY4\_9LACT

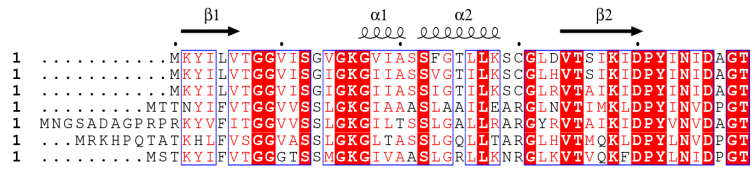

SP|Q9VUL1|PYRG\_DROME

SP|Q9VUL1|PYRG\_DROME
SP|P17812|PYRG1\_HUMAN
SP|Q9NRF8|PYRG2\_HUMAN
SP|P0A7E5|PYRG\_ECOLI
SP|Q5S1A8|PYRG\_THET8
SP|P9WHK7|PYRG\_MYCTU
TR|A0A2A9ISY4|A0A2A9ISY4\_9LACT

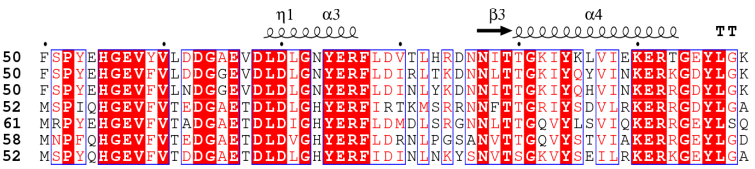

SP|Q9VUL1|PYRG\_DROME

SP|Q9VUL1|PYRG\_DROME
SP|P17812|PYRG1\_HUMAN
SP|Q9NRF8|PYRG2\_HUMAN
SP|P0A7E5|PYRG\_ECOLI
SP|Q5S1A8|PYRG\_THET8
SP|P9WHK7|PYRG\_MYCTU
TR|A0A2A9ISY4|A0A2A9ISY4\_9LACT

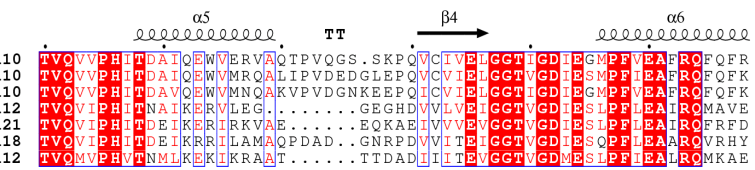

SP|Q9VUL1|PYRG\_DROME

SP|Q9VUL1|PYRG\_DROME
SP|P17812|PYRG1\_HUMAN
SP|Q9NRF8|PYRG2\_HUMAN
SP|P0A7E5|PYRG\_ECOLI
SP|Q5S1A8|PYRG\_THET8
SP|P9WHK7|PYRG\_MYCTU
TR|A0A2A9ISY4|A0A2A9ISY4\_9LACT

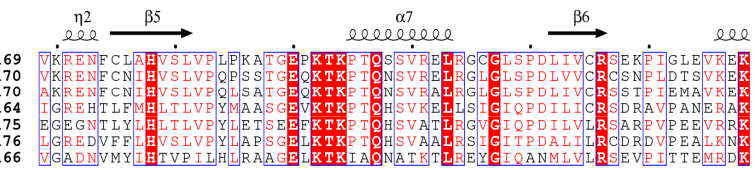

SP|Q9VUL1|PYRG\_DROME

SP|Q9VUL1|PYRG\_DROME
SP|P17812|PYRG1\_HUMAN
SP|Q9NRF8|PYRG2\_HUMAN
SP|P0A7E5|PYRG\_ECOLI
SP|Q5S1A8|PYRG\_THET8
SP|P9WHK7|PYRG\_MYCTU
TR|A0A2A9ISY4|A0A2A9ISY4\_9LACT

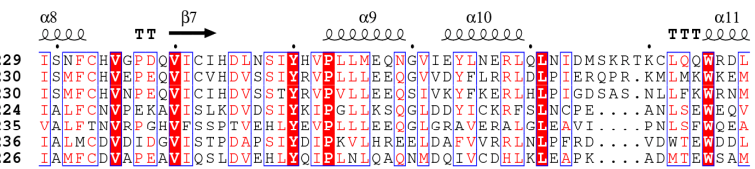

SP|Q9VUL1|PYRG\_DROME

SP|Q9VUL1|PYRG\_DROME
SP|P17812|PYRG1\_HUMAN
SP|Q9NRF8|PYRG2\_HUMAN
SP|P0A7E5|PYRG\_ECOLI
SP|Q5S1A8|PYRG\_THET8
SP|P9WHK7|PYRG\_MYCTU
TR|A0A2A9ISY4|A0A2A9ISY4\_9LACT

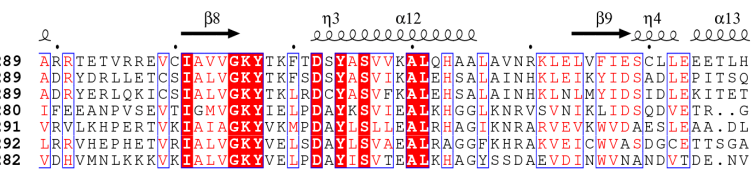

SP|Q9VUL1|PYRG\_DROME

SP|Q9VUL1|PYRG\_DROME
SP|P17812|PYRG1\_HUMAN
SP|Q9NRF8|PYRG2\_HUMAN
SP|P0A7E5|PYRG\_ECOLI
SP|Q5S1A8|PYRG\_THET8
SP|P9WHK7|PYRG\_MYCTU
TR|A0A2A9ISY4|A0A2A9ISY4\_9LACT

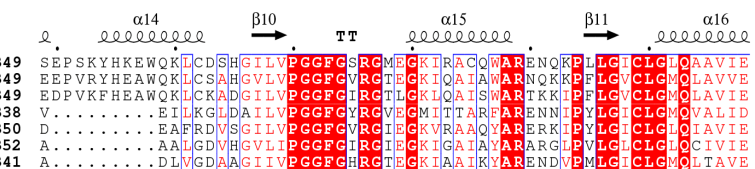

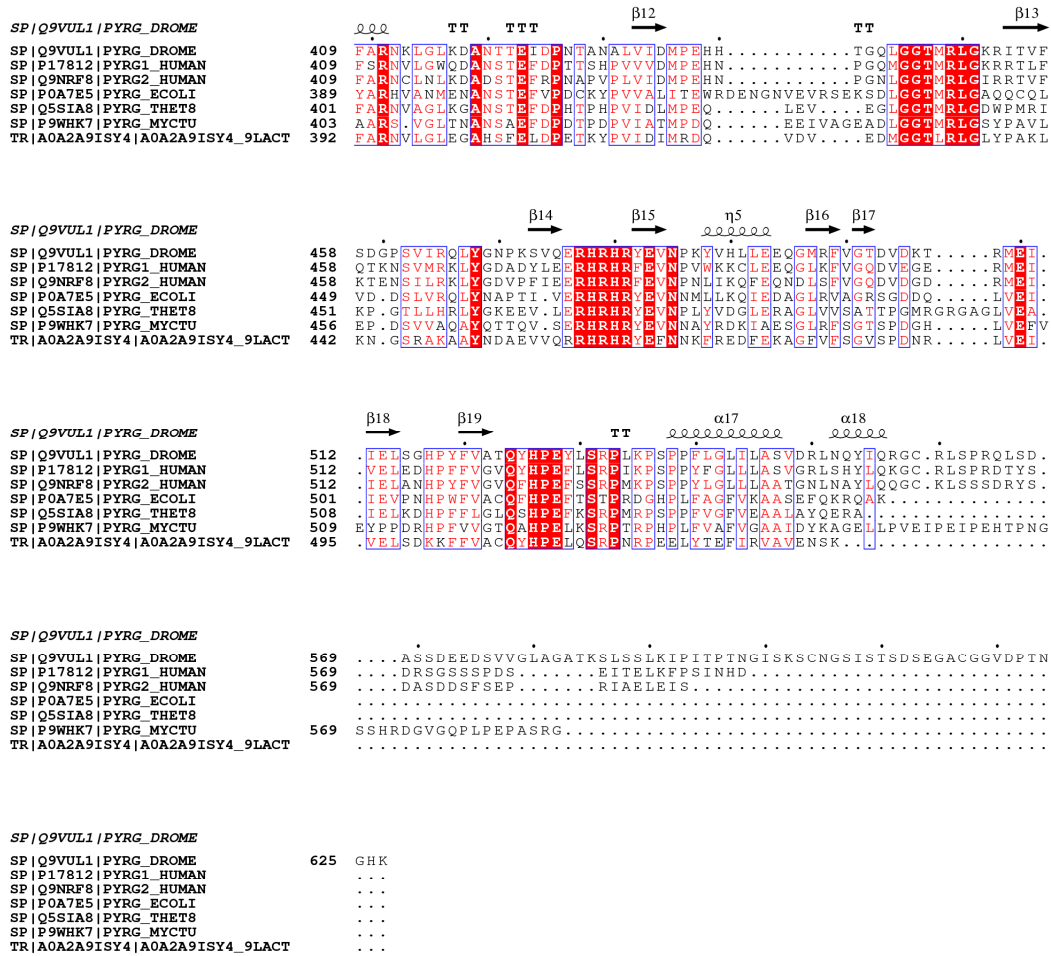

Figure S12. Comparison of CTPS sequences of various organisms.



## **Legends for SI Appendix videos**

**SUPPLEMENTAL MOVIE S1. Animation of CTPS morphing from the CTP-state to DON-state tetramer conformations.** The movie displays the dmCTPS structure morphed from product-bound to substrate-bound state. Colored by monomer.
